# Supplementary material for: Protein Translation Inhibition is Involved in the Activity of the Pan-PIM Kinase Inhibitor PIM447 in Combination with Pomalidomide-Dexamethasone in Multiple Myeloma
Source: MDPI journal article supplement (doi:10.3390/cancers12102743), 2020-09-24
Supplement: s1 [file s1]

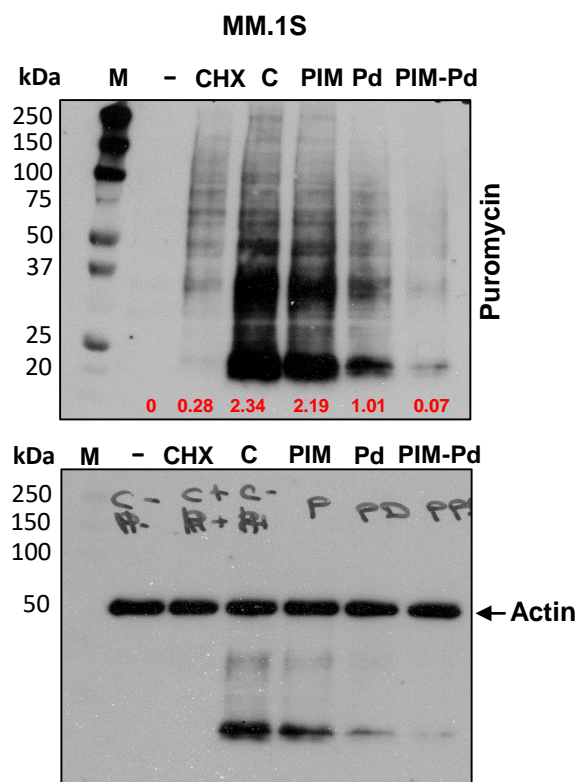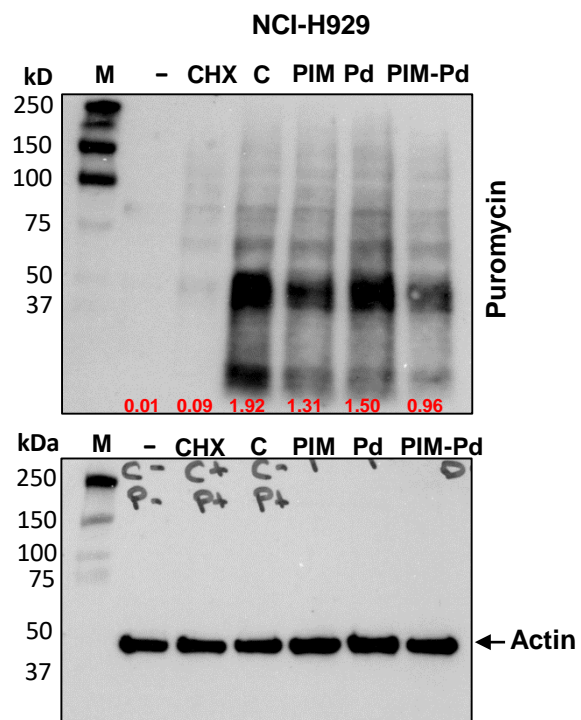

**Western blot images supporting Figure 3A.** M: molecular weight marker

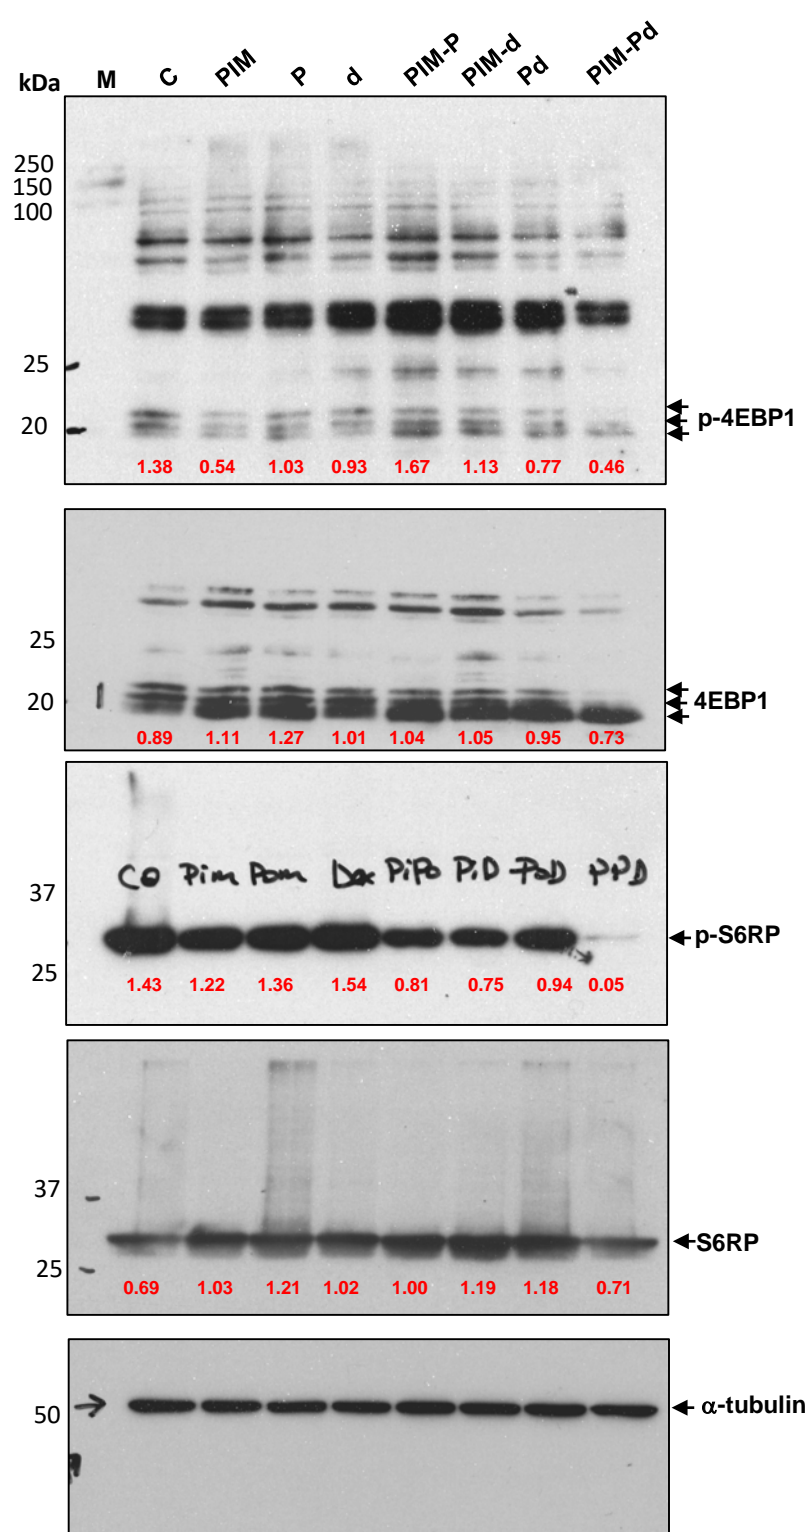

**Western blot images supporting Figure 3B. M: molecular weight marker**

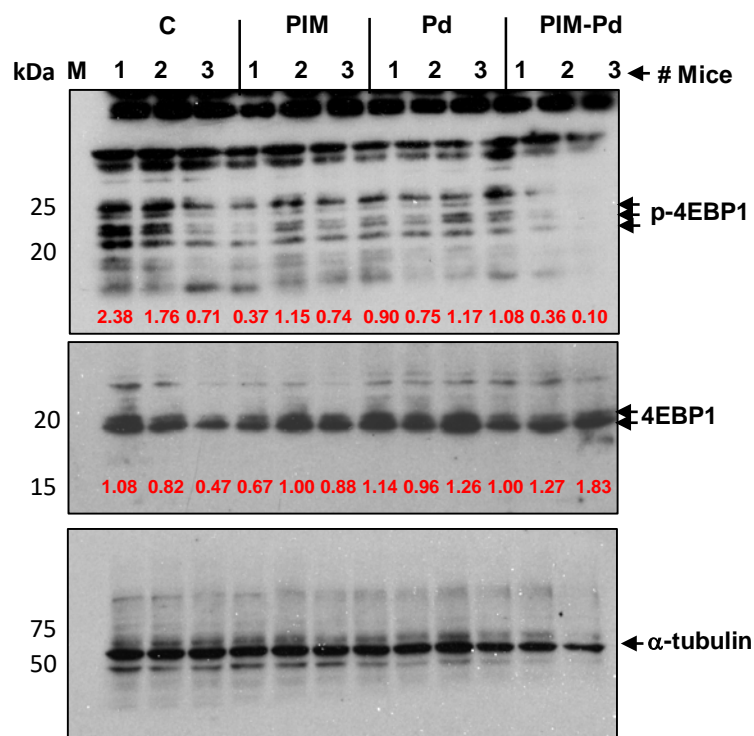

Western blot images supporting Figure 3C. M: molecular weight marker

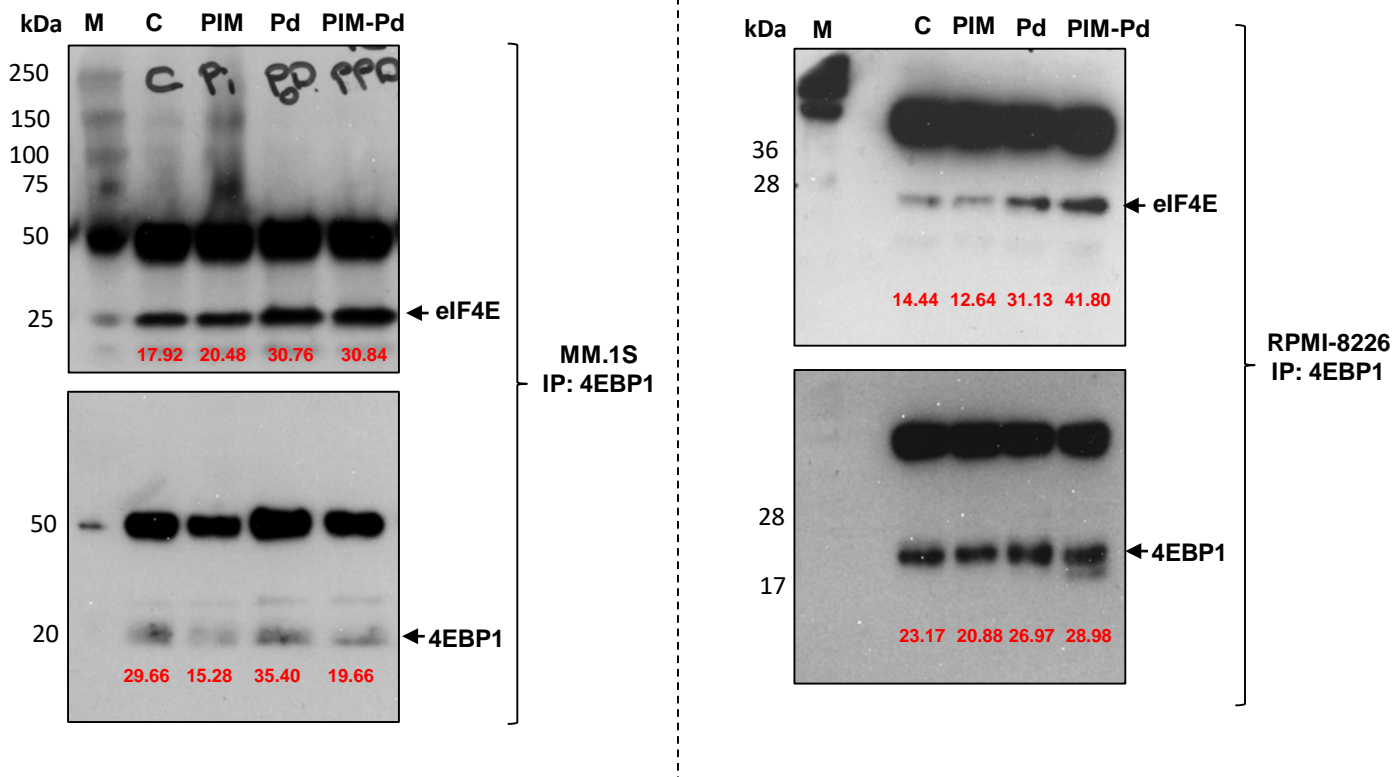

**Western blot images supporting Figure 3D.** M: molecular weight marker

# MM.1S

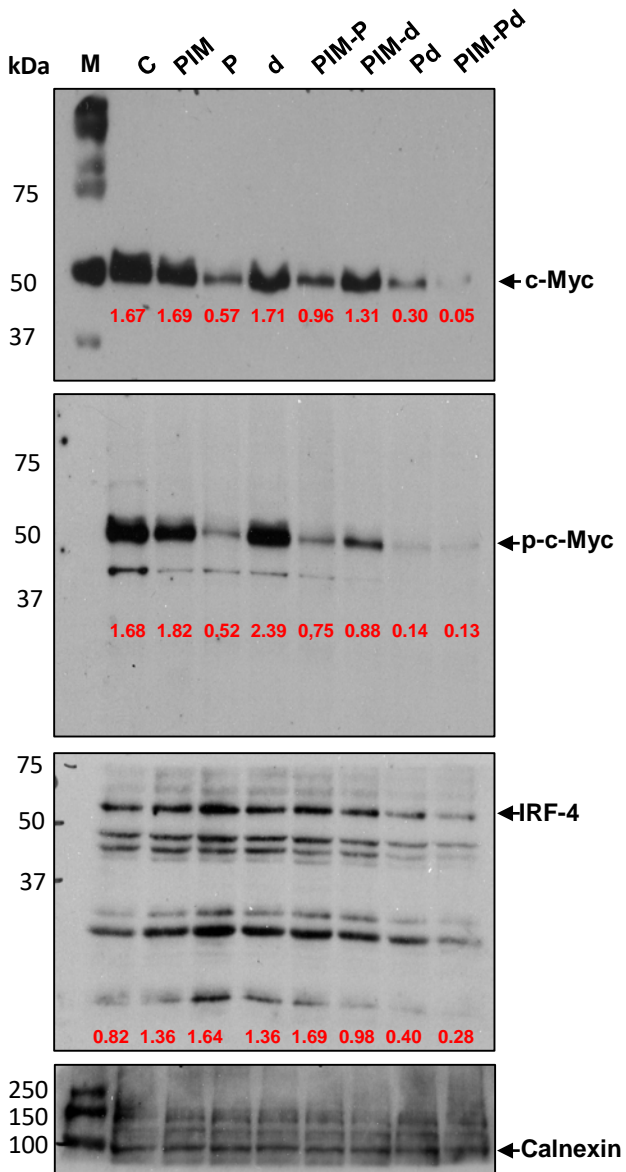

# NCI-H929

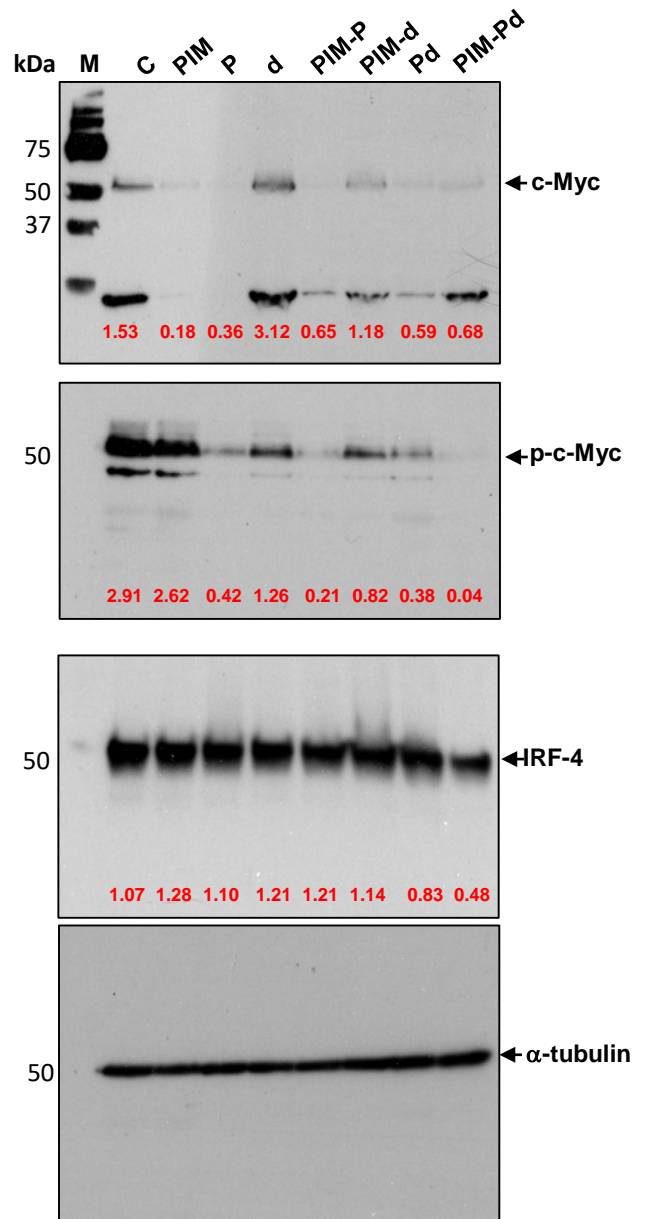

Western blot images supporting Figure 4A. M: molecular weight marker

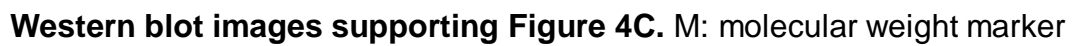



# MM.1S

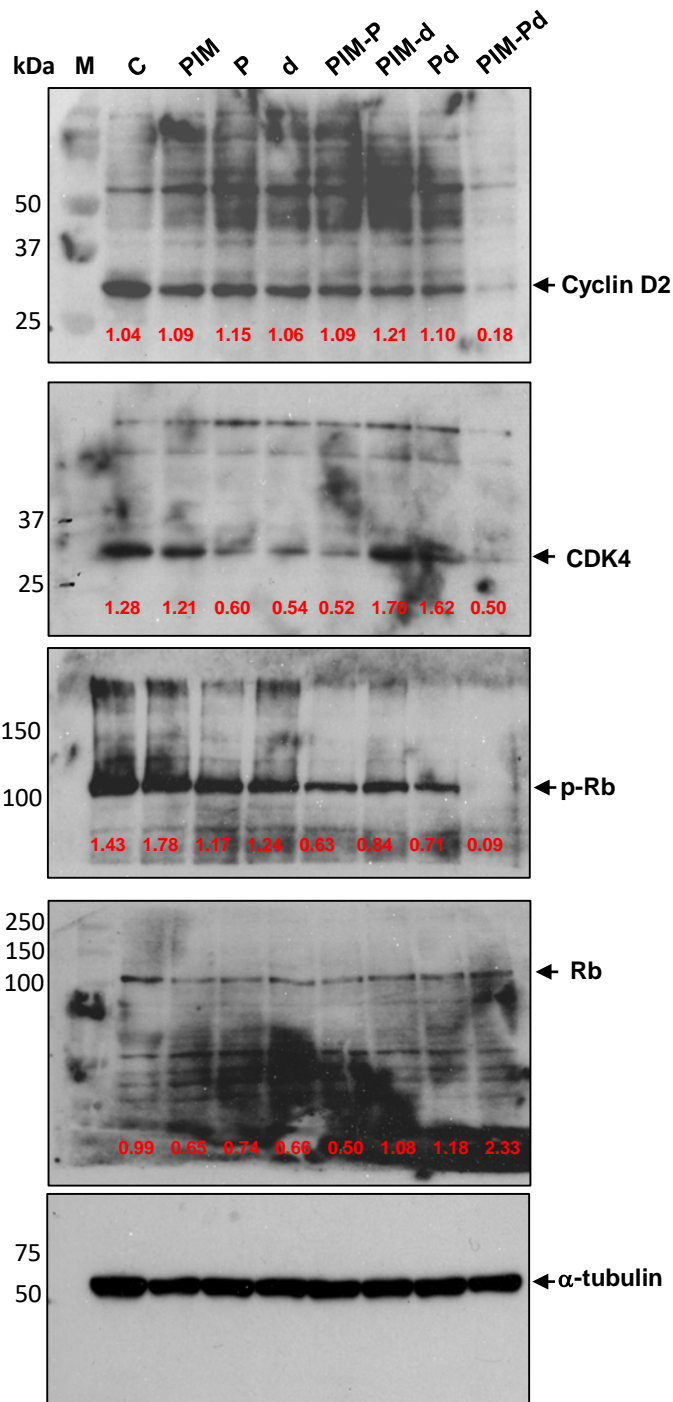

# NCI-H929

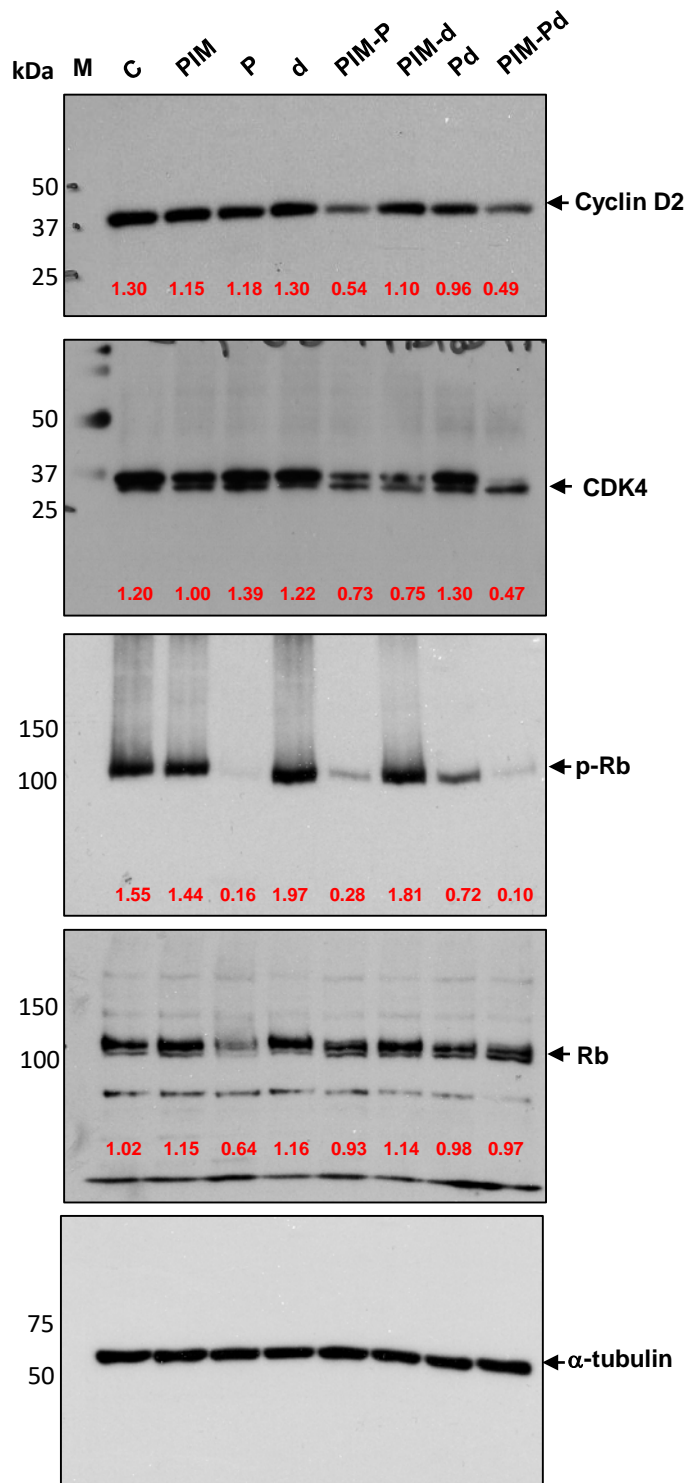

Western blot images supporting Figure 6B. M: molecular weight marker

# RPMI-8226

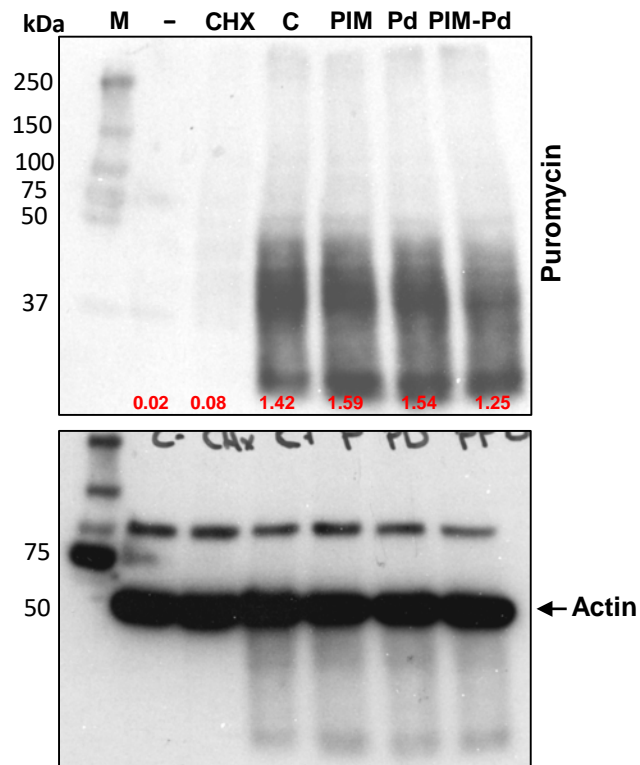

**Western blot images supporting Figure S4A.** M: molecular weight marker



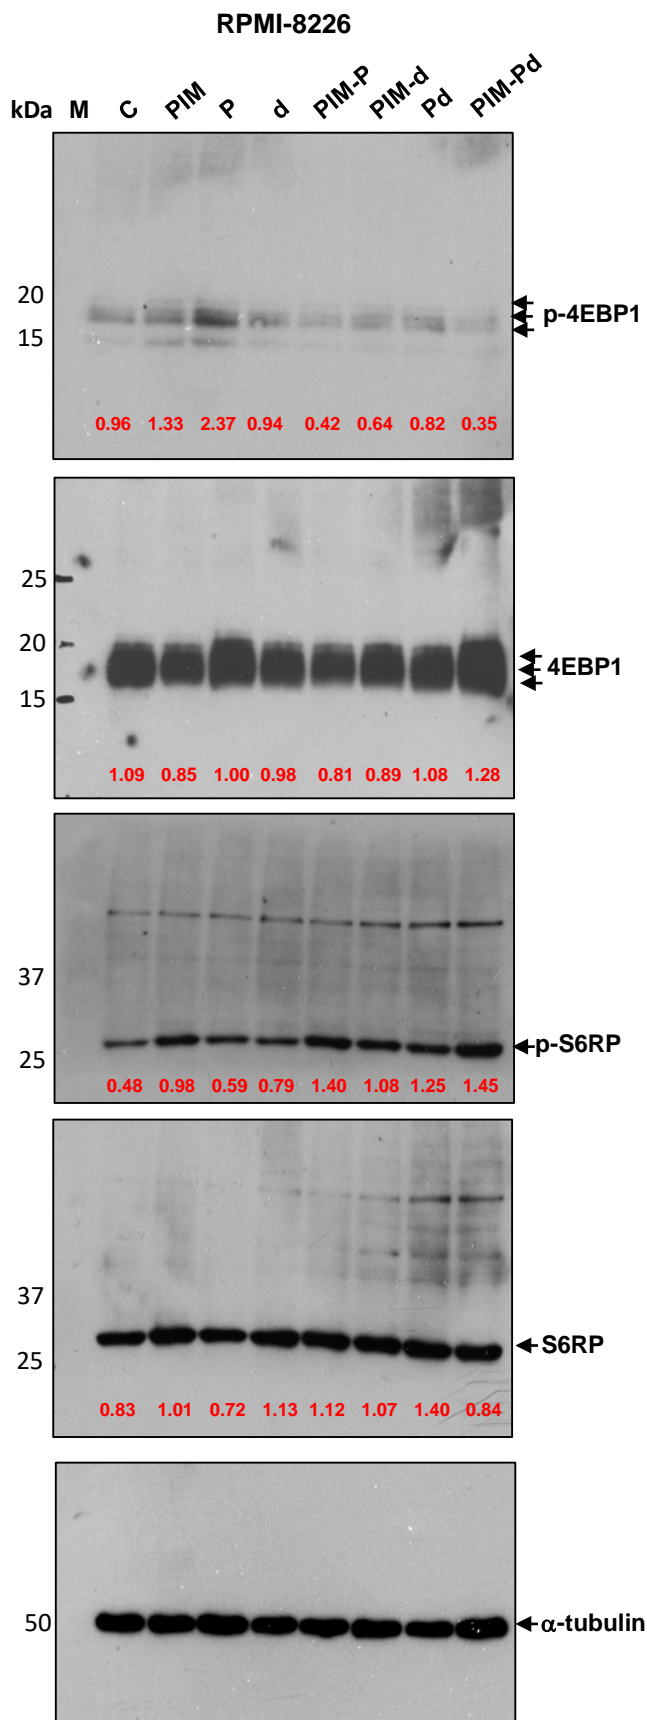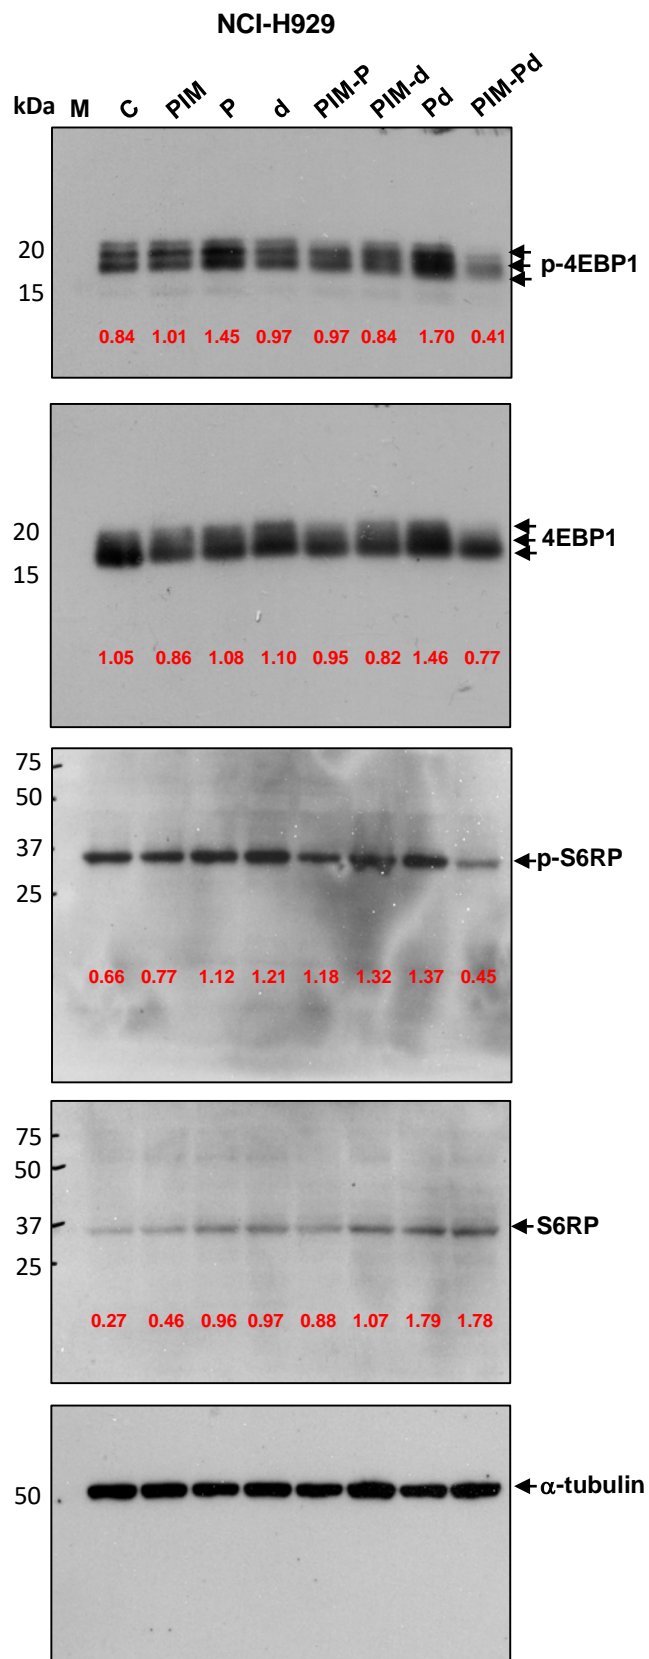

**Western blot images supporting Figure S4B.** M: molecular weight marker

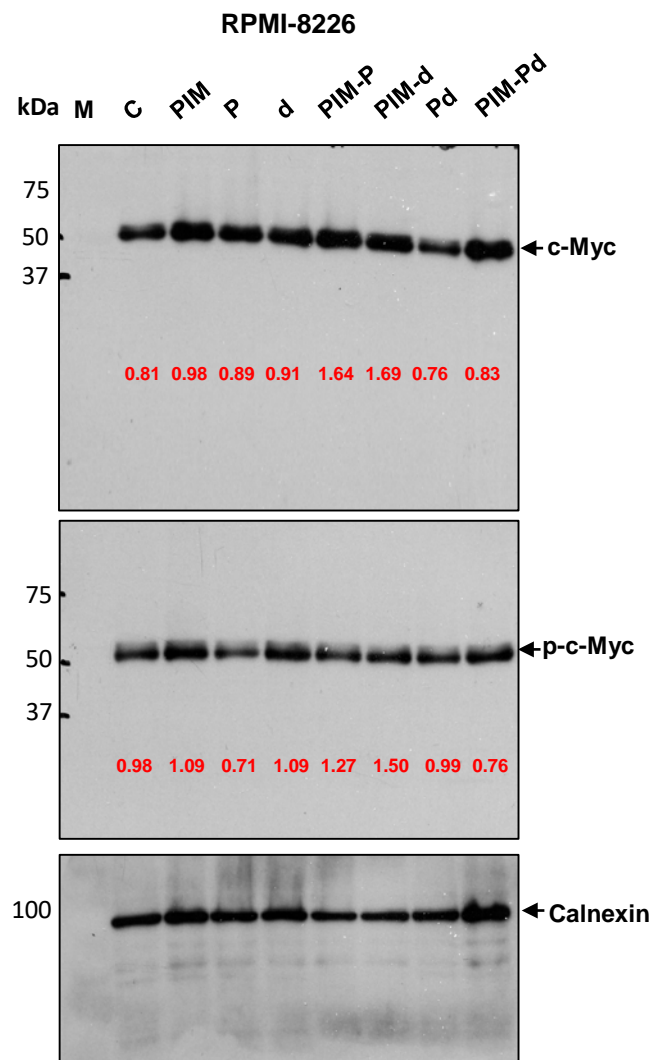

**Western blot images supporting Figure S5A.** M: molecular weight marker

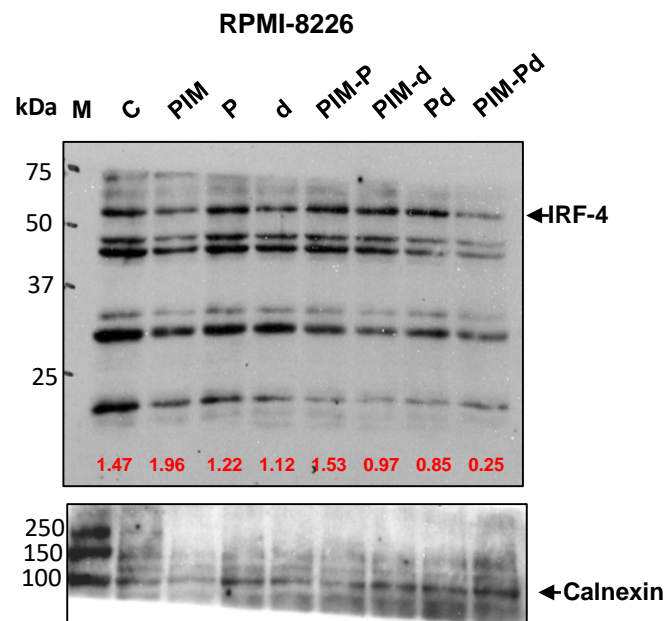

**Western blot images supporting Figure S5B.** M: molecular weight marker
